# Supplementary material for: Threshold voltage tuning of IGZTO thin-film transistors deposited by RF sputtering for high-resolution flexible displays using deep ultraviolet light
Source: Royal Society of Chemistry journal article supplement (doi:10.1039/d3tc01379k), 2023-01-01
Supplement: d3tc01379k1.pdf [file d3tc01379k1.pdf]

## Supporting Information

### Threshold voltage tuning of IGZTO thin-film transistors deposited by RF sputtering for high-resolution flexible displays using deep ultraviolet light.

*In Pyo Park, Bu Kyeong Hwang, Bo Ram Lee, Pung Keun Song\*, Soo Won Heo\**

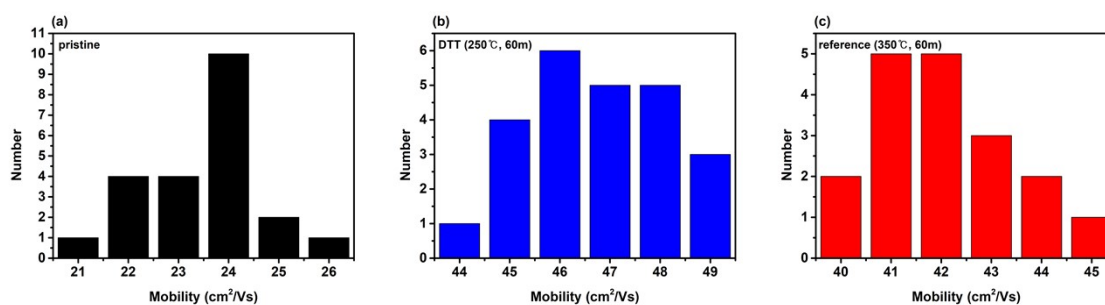

Figure S1. Mobility distributions of TFT devices with various annealing treatments applied to IGZTO thin film. (a)pristine IGZTO TFT, (b)DTT (250°C, 60m) IGZTO TFT, (c)reference (350°C, 60m) IGZTO TFT. At least 18 devices were fabricated and evaluated.

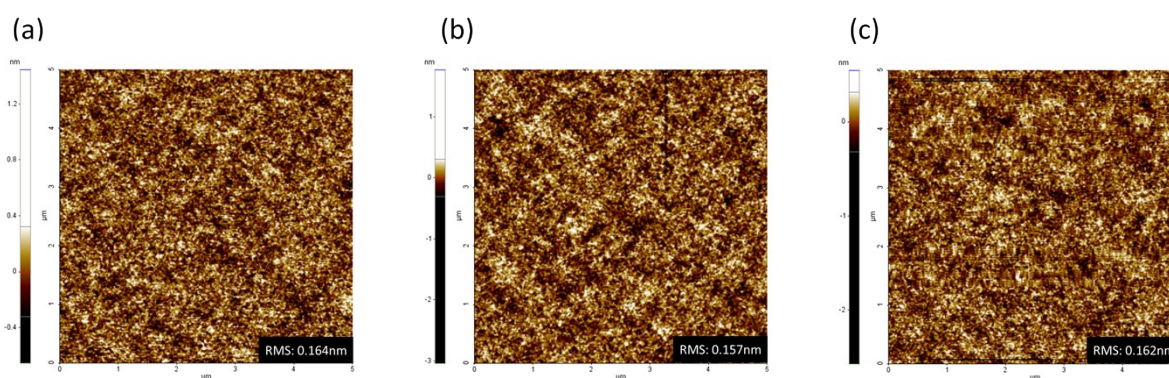

Figure S2. AFM images of (a) pristine, (b) DTT (250 °C, 60 min), and (c) reference (350 °C, 60 min), respectively.

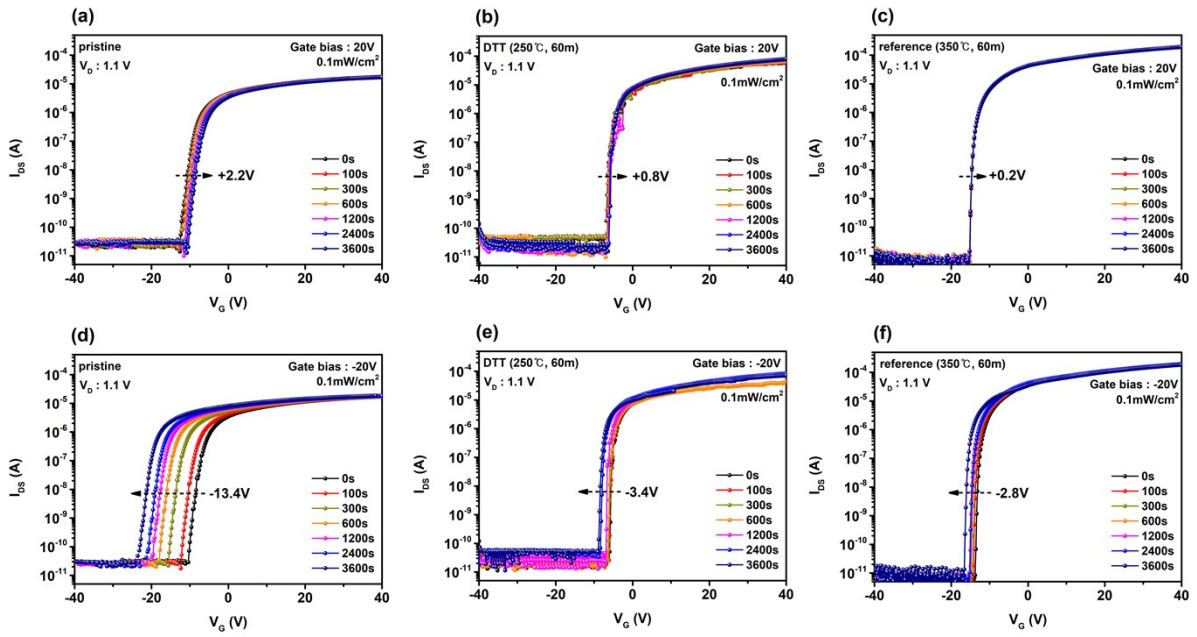

Figure S3. Positive bias illumination stress and negative bias illumination stress of (a)(d) pristine, (b)(e) DTT (250 °C, 60 min), and (c)(f) reference (350 °C, 60 min), respectively.
